# The Structure of Microbial Community and Degradation of Diatoms in the Deep Near-Bottom Layer of Lake Baikal

Yulia R. Zakharova<sup>1\*</sup>, Yuri P. Galachyants<sup>1</sup>, Maria I. Kurilkina<sup>1</sup>, Alexander V. Likhoshvay<sup>1</sup>, Darya P. Petrova<sup>1</sup>, Sergey M. Shishlyannikov<sup>1</sup>, Nikolai V. Ravin<sup>2</sup>, Andrey V. Mardanov<sup>2</sup>, Alexey V. Beletsky<sup>2</sup>, Yelena V. Likhoshway<sup>1\*</sup>

<sup>1</sup>Limnological Institute, Siberian Branch, Russian Academy of Sciences, Irkutsk, Russia, <sup>2</sup>Bioengineering Center, Russian Academy of Sciences, Moscow, Russia

## Abstract

Insight into the role of bacteria in degradation of diatoms is important for understanding the factors and components of silica turnover in aquatic ecosystems. Using microscopic methods, it has been shown that the degree of diatom preservation and the numbers of diatom-associated bacteria in the surface layer of bottom sediments decrease with depth; in the near-bottom water layer, the majority of bacteria are associated with diatom cells, being located either on the cell surface or within the cell. The structure of microbial community in the near-bottom water layer has been characterized by pyrosequencing of the 16S rRNA gene, which has revealed 149 208 unique sequences. According to the results of metagenomic analysis, the community is dominated by representatives of Proteobacteria (41.9%), Actinobacteria (16%); then follow Acidobacteria (6.9%), Cyanobacteria (5%), Bacteroidetes (4.7%), Firmicutes (2.8%), Nitrospira (1.6%), and Verrucomicrobia (1%); other phylotypes account for less than 1% each. For 18.7% of the sequences, taxonomic identification has been possible only to the Bacteria domain level. Many bacteria identified to the genus level have close relatives occurring in other aquatic ecosystems and soils. The metagenome of the bacterial community from the near-bottom water layer also contains 16S rRNA gene sequences found in previously isolated bacterial strains possessing hydrolytic enzyme activity. These data show that potential degraders of diatoms occur among the vast variety of microorganisms in the near-bottom water of Lake Baikal.

**Citation:** Zakharova YR, Galachyants YP, Kurilkina MI, Likhoshvay AV, Petrova DP, et al. (2013) The Structure of Microbial Community and Degradation of Diatoms in the Deep Near-Bottom Layer of Lake Baikal. PLoS ONE 8(4): e59977. doi:10.1371/journal.pone.0059977

**Editor:** Melanie R. Mormile, Missouri University of Science and Technology, United States of America

**Received:** October 7, 2012; **Accepted:** February 20, 2013; **Published:** April 1, 2013

**Copyright:** © 2013 Zakharova et al. This is an open-access article distributed under the terms of the Creative Commons Attribution License, which permits unrestricted use, distribution, and reproduction in any medium, provided the original author and source are credited.

**Funding:** This study was supported by the Russian Foundation for Basic Research (project no. 09-04-12231ofi-m) and by the Integration Project of the Siberian Branch of the Russian Academy of Sciences, no. 137 "Development of new approaches to process data generated by Next-generation sequencing machines." The funders had no role in the study design, data collection and analysis, decision to publish, or preparation of the manuscript.

**Competing Interests:** The authors have declared that no competing interests exist.

\* E-mail: zakharova@lin.irk.ru (YRZ); yel@lin.irk.ru (YVL)

## Introduction

Studies on the diversity of the microbial community colonizing diatoms can provide an insight into the role of microorganisms in degradation of diatoms and turnover of biogenic elements, including Si. In the world ocean, bacteria have been shown to colonize fresh diatom detritus [1], living diatoms [2], and sea snow aggregates [3]. They utilize approximately half of organic matter from primary production [4] with the aid of hydrolytic enzymes [2,3]. Secreted extracellular polysaccharides, organic components of the cell wall, and cell contents can serve as substrates for the development of heterotrophic bacteria in algal–bacterial communities.

In the pelagic zone of the world ocean, approximately 40% of photosynthetically fixed carbon is expended for producing extracellular polymeric substances (EPS) [5–7]. Polysaccharides are the main constituent of EPS [8–13], which also contain several percent of proteins [9,14]. In freshwater ecosystems, protein and polysaccharide components of diatom EPS can be utilized for bacterial growth, which has been confirmed in model experiments [15,16].

The organic casing of diatom cell walls [17] is decomposed by proteases produced by colonizing bacteria, which leads to

accelerated dissolution of siliceous diatom frustules [18]. In marine diatoms, the *in situ* dissolution rate of diatom silica has been shown to increase significantly under the effect of natural marine bacteria representing specific phylotypes of  $\alpha$ -,  $\beta$ -,  $\gamma$ -Proteobacteria, the Cytophaga–Flavobacterium–Bacteroides (CFB) group, Actinobacteria, and Firmicutes [18–20].

Lake Baikal, situated in a center of Eurasia, is one of the world's more unusual freshwater ecosystems. Estimated to be over 25 million years old, Lake Baikal is also the world's deepest (maximum depth 1642 m) and largest lake, in terms of water volume (23 015 km<sup>3</sup>), containing some 20% of the world's surface freshwater. Fossil diatom remains from the bottom sediments of Lake Baikal are widely used for paleoclimatic and paleolimnological reconstructions, and deeper insight into the factors responsible for their preservation or destruction may significantly contribute to the accuracy of the results. As shown by scanning electron microscopy, diatom frustules from Baikal bottom sediments are preserved to different degrees [21]. Moreover, some diatom species fail to descend to the lake bottom [22–24]. For example, *Synedra acus* is a member of the dominant assemblage of recent Baikal phytoplankton, but its remains in the upper layer of bottom sediments can be found not in all regions of the lake [24–26], because this diatom is subject to considerable degrada-

tion both in the water column [27] and in the surface sediment layer [23]. On the other hand, diatom records from Postglacial [28,29] and Pleistocene sediments [30–33] are characterized by “*Synedra* peaks”, or aggregations of siliceous frustules of this diatom, which are used for biostratigraphic correlation of core samples [28].

Diatoms that long remain in the near-bottom layer before being buried in bottom sediments can serve as a substrate for various microorganisms [34]. Several bacterial strains that we recently isolated from the deep near-bottom water of Lake Baikal were found to possess hydrolytic enzyme activities and suppress the growth of *S. acus* culture [35]. However, culturing methods alone are obviously insufficient for comprehensive characterization of microbial communities associated with diatoms. Their structure can be studied by analyzing clone libraries of 16S rRNA genes [16], [36–38], but the scope of this method is as yet limited to several tens to hundreds of 16S rRNA gene sequences.

Metagenomic analysis [39] has been used to evaluate the diversity of microorganisms in marine ecosystems [40–44], thermal springs [45,46], and fresh water bodies [47], including sites with gas hydrate-bearing sediments in Lake Baikal [48].

The purpose of this study was to characterize microbial diversity in Baikal near-bottom waters by means of large-scale pyrosequencing of 16S rRNA gene fragments. The results provided evidence for the presence of potential degraders of diatoms among the vast variety of microorganisms inhabiting this water layer.

## Materials and Methods

### Sampling Sites and Procedure

No specific permits were required for the described field studies. The location is not privately-owned or protected in any way. The field studies did not involve endangered or protected species.

Samples were collected with a benthic gravity corer (BGC). One core was sampled from the upper sediment layer in Southern Baikal in June 2008 (51°46′40″ N, 104°54′33″ E; depth 1460 m). The cores were cross-cut into 1-cm fragments, fixed with 70% ethyl alcohol, and stored in Eppendorf tubes at 4°C. For analysis of near-bottom water six cores were sampled at one site in Middle Baikal in September 2009 (52°53′46″ N, 107°31′53″ E, depth 1570 m). It was a year of the *Synedra acus* dominance in the spring phytoplankton of the lake. Aliquots from the near-bottom water samples (about 5 cm above the sediment surface) were taken from BGCs and pooled in one sample (total volume 2 L). For metagenomic analysis, suspended matter was collected from water samples by filtering through nitrocellulose membrane with a pore size of 0.2 µm (Sartorius, Germany), washed from the filter with 5 mL of TE buffer (10 mM Tris-HCl, 1 mM EDTA; pH 7.5) into a sterile vial, and stored at –20°C. To take microbial counts, the samples were fixed with 1% glutaraldehyde solution (Sigma, United States).

### Counts of Microorganisms in Sediments and Near-bottom Water

Cell fixation and staining followed the procedure described by Perenthaler *et al.* [49]. Briefly, a suspension of bottom sediments in sterile water (1: 100) was filtered through a polycarbonate membrane with a pore size of 0.2 µm (Millipore, Ireland), which was then dried, coated with 0.08% agarose, and cut into sectors. These sectors were placed on glass slides and stained with 1 ml of 1 µg/mL 4,6-diamidino-2-phenylindole (DAPI) solution in PBS : glycerol mixture (3: 7). Aliquots of near-bottom water samples (1 mL) were fixed with 1% glutaraldehyde solution, stained with 1 µg/mL DAPI for 2–3 min, and filtered through polycarbonate

membrane (0.2 µm) using Sartorius filter units. The filters were washed with sterile water, dried in air, placed on glass slides in a drop of nonfluorescent immersion oil (MiniMed, Russia), and examined under an Axiovert 200 inverted microscope (Carl Zeiss, Germany) at an excitation wavelength of 365 nm (Osram HBO 50W/AC mercury lamp). Counts were taken in no less than 30 microscopic fields per sample; subsequent calculations were performed as described [50]. Microscopic images were made using a Penguin 600CL digital camera (Pixera Corp., United States) with the AxioSet program. The results were processed statistically [51] with the Microsoft Excel 2007.

### Scanning Electron Microscopy (SEM)

Samples of near-bottom water and sediments were centrifuged in Eppendorf tubes at 12 000 rpm for 15 min, treated with 30% hydrogen peroxide in a thermostat at 75°C for 3 h, and incubated there overnight after the thermostat was switched off. The material was then washed with distilled water, pelleted again, pipetted onto a stub for SEM, dehydrated, and sputter-coated with gold in an SDC 004 vacuum evaporator (Balzers, Liechtenstein). Preparations were examined under scanning electron microscopes Philips 525 M (Netherlands) and FEI Quanta 200 (United States).

### DNA Isolation

Total DNA was isolated as described [52], with certain modifications. Briefly, the cells were washed in TE buffer (pH 8.0), and lysed by treating with lysozyme (1 µg/mL in 400 µL of TE buffer) at 37°C for 1 h. The lysate was then supplemented with SDS to a final concentration of 1%, incubated at room temperature for 10 min, and frozen at –20°C. After thawing at +56°C, proteins and polysaccharides were extracted with a phenol : chloroform : isoamyl alcohol mixture (25: 24: 1). Nucleic acids were precipitated from the aqueous phase by adding 0.1 volume of 3 M sodium acetate (pH 5.5) and 2.5 volumes of absolute ethanol. The mixture was incubated overnight at –20°C and centrifuged at 16 100 rpm for 30 min. The pellet was washed with two portions of 70% ethyl alcohol and dissolved in TE buffer.

### Pyrosequencing

Pyrosequencing was performed using a library of amplicons generated by PCR with universal 16S rRNA gene primers U341F (CCTACGGGRSGCAGCAG) and U515R (TTACCGCGGCKGCTGVCAC). Amplicons for pyrosequencing were made in 4 replicates and pooled in one sample. The amplicons were sequenced with a GS FLX 454 genome sequencer (Roche, USA) using Titanium reagents according to recommendation of the manufacturer.

### Analysis of Pyrosequencing Data

Analysis of pyrosequencing data was performed using the Mothur 1.19.0 program package [53]. The obtained sequences (Table 1, stage 1) were processed by the PyroNoise algorithm [54] to remove sequencing errors (Table 1, stage 2), and then sequences longer than 100 bp with homopolymer tracts of no more than 6 bp were selected (Table 1, stage 3) and aligned with the bacterial 16S rRNA gene sequences from the SILVA database [http://www.mothur.org/wiki/Silva\_reference\_files]. The NAST algorithm [55] with a k-mer length of 8 bp was employed for sequence alignment. Sequences shorter than 130 bp that did not map to the V3 region of the 16S rRNA gene (positions 6428–11 892 relative to the initial SILVA alignment) were excluded from further analysis (Table 1, stage 3). Nucleotide sequences of the 16S rRNA were deposited in NCBI Short Read Archive (SRAd:

SRR653441). During the preclustering stage, sequences differing by one nucleotide were combined into clusters (Table 1, stage 4). Chimeric sequences were detected by the UCHIME algorithm [56] with standard parameters (Table 1, stage 5). In calculating the genetic distance matrix, multiple insertions or deletions represented by consecutive gaps were assumed to be the result of a single mutation event. Sequence clustering was based on UPGMA analysis of genetic distances. After clustering, the operational taxonomic units (OTUs) containing only one sequence upon clustering at a genetic distance level of 0.01 (singleton OTU<sub>0.01</sub>) were discarded (Table 1, stage 6).

### Taxonomic Analysis

Taxonomic analysis was based on the Bayesian approach [57] and the taxonomy from the Ribosomal Database Project [58]. Sequence reads were clustered into OTUs with a distance cutoff of 0.03 (OTU<sub>0.03</sub>), and the clusters with a bootstrap support of at least 80% (after 1000 iterations) were assigned into taxa using the SILVA database (see above). The results were converted into the Newick format using the custom Perl script and visualized with the Tree Graph program [59]. The dendrogram showed only those branches that extended from nodes accounting for no less than 1% of all reads. If the number of reads classified into a terminal node was smaller, the branch was reduced to the intermediate node satisfying this criterion.

### Population Analysis

For population analysis, rarefaction curves were plotted by means of read sampling (with 10 000 iterations, at an interval of 1000 reads) and calculation of OTUs observed at distances of 0.01, 0.03, 0.05, and 0.07. The results were used to characterize the molecular genetic diversity of the community by calculating parameters of species richness (S), Good's coverage, the ACE and Chao1 estimators, and Simpson's inverse index for each of the above distances. Chao1 and ACE indices are one of the most widely used non-parametric estimators of species richness. Theory behind these indices is easily accessible [60]. Alignment with known 16S rRNA gene sequences was performed with the BLASTN program [61].

## Results

### Association of Bacteria with Diatoms and the Degree of Diatom Preservation

As shown by microscopic analysis, the near-bottom microbial community was dominated by diatoms *S. acus* subsp. *radians* and free-living or diatom-associated bacteria. Figures 1A and 1B show organisms (DAPI staining – blue) which colonize the diatom *S.*

*acus*. At the same time, chloroplasts which have to be in red under ultraviolet, are not seen. Therefore, we observed the degraded cells of diatoms and bacteria colonizing them. The latter were located either on the cell surface or within the cell (Figures 1A, B) and accounted for about 48% ( $6.5 \times 10^5$  cells/mL) of the total amount of bacteria ( $1.4 \times 10^6$  cells/mL). In sediment samples, diatom-associated microorganisms were distributed unevenly, with their proportion decreasing from 49% at a depth of 1 cm to zero at 7 cm (Figure 2). The degree of diatom preservation also changed with depth: frustules found in the surface layer were mainly intact (Figures 3A, B), while deeper layers (2–7 cm) contained an increasing proportion of broken and degraded frustules (Figures 3C, D, E, F).

### Metagenomic Analysis of Near-bottom Bacterial Community

Pyrosequencing of the 16S rRNA gene amplicon library resulted in more than 370 000 sequence reads with a total length of about  $67 \times 10^6$  bp (Table 1). These reads were preprocessed in order to obtain a high-quality sequence alignment providing for the minimum possible distortion in characterization of the bacterial community. As a result, the total amount of data and the number of reads were reduced by factors of about 3 and 2.4, respectively (Table 1).

Metagenomic analysis provided evidence for - significant molecular genetic diversity of the bacterial community from the near-bottom Baikal waters. Rarefaction curves Figure 4 and nonparametric estimators ACE and Chao (Table 2) confirmed that the sample size was sufficient for revealing 93% of OTU<sub>0.01</sub> and 99.99% of OTU<sub>0.05</sub> (this clustering distance empirically corresponds to the family rank). At the same time, the abundance of certain bacterial groups accounted for a decreased species evenness in the community: the values of Simpson's inverse index were one to two orders of magnitude lower than the observed number of OTUs at all distance levels (Table 2), indicating that the community included a number of rare bacterial species. The community richness inferred by Chao1 and ACE estimators tends to the observed number of OTUs when the clustering distance runs above 0.03. This fact suggests that the community richness observed at clustering distances above 0.03 is likely to be close to the actual numbers. Significant difference between the actual number of OTU<sub>0.01</sub> and richness estimated by Chao1<sub>0.01</sub> and ACE<sub>0.01</sub> is attributed to the large number of minor clusters (singletons, doubletons etc.) at this distance. This, in its turn, could be the result of both pyrosequencing errors and deep sequencing strategy used.

**Table 1.** Pre-processing of pyrosequencing data.

| No | Step                                           | Total number of reads | Number of unique reads | Average read length (bp) | Total data size (bp × 10 <sup>6</sup> ) |
|----|------------------------------------------------|-----------------------|------------------------|--------------------------|-----------------------------------------|
| 1  | Raw data                                       | 373377                | NA                     | 190                      | 67                                      |
| 2  | Initial filtering, Pyronoise                   | 166588                | 40731                  | 148                      | 24                                      |
| 3  | Alignment of reads                             | 157131                | 36569                  | 148                      | 23                                      |
| 4  | Pre-clustering                                 | 157131                | 24433                  | 148                      | 23                                      |
| 5  | Remove the chimeric sequences and contaminants | 154248                | 23057                  | 148                      | 23                                      |
| 6  | Remove the singleton OTUs                      | 149208                | 18017                  | 148                      | 23                                      |

doi:10.1371/journal.pone.0059977.t001

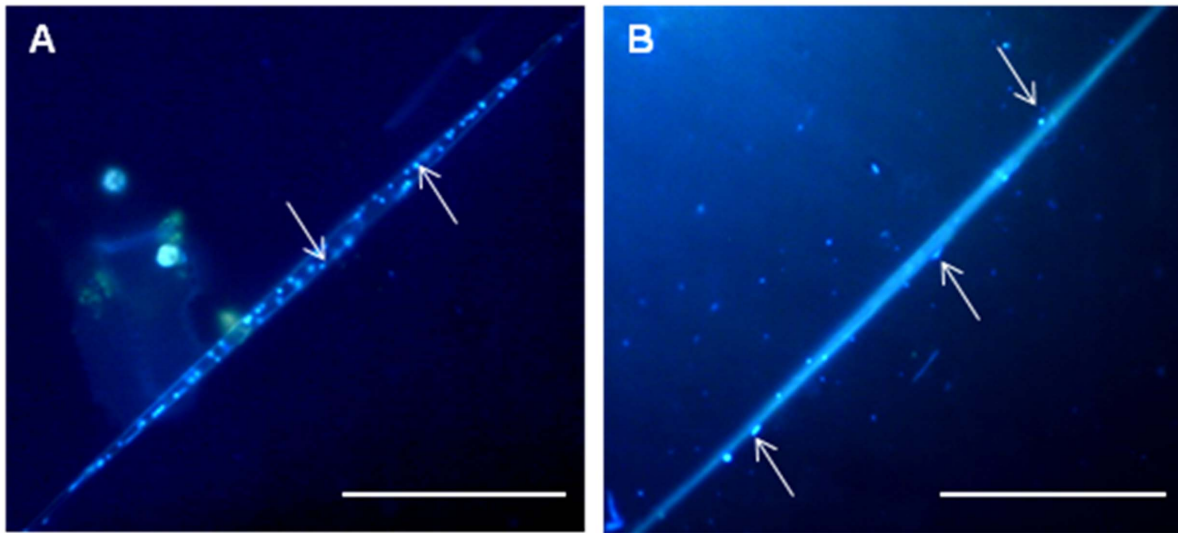

**Figure 1. Microorganisms associated with the diatom *Synedra acus* in the near-bottom water layer of Lake Baikal.** (indicated by arrows). Epifluorescent microscopy, DAPI staining. Scale bar 50  $\mu\text{m}$ .  
doi:10.1371/journal.pone.0059977.g001

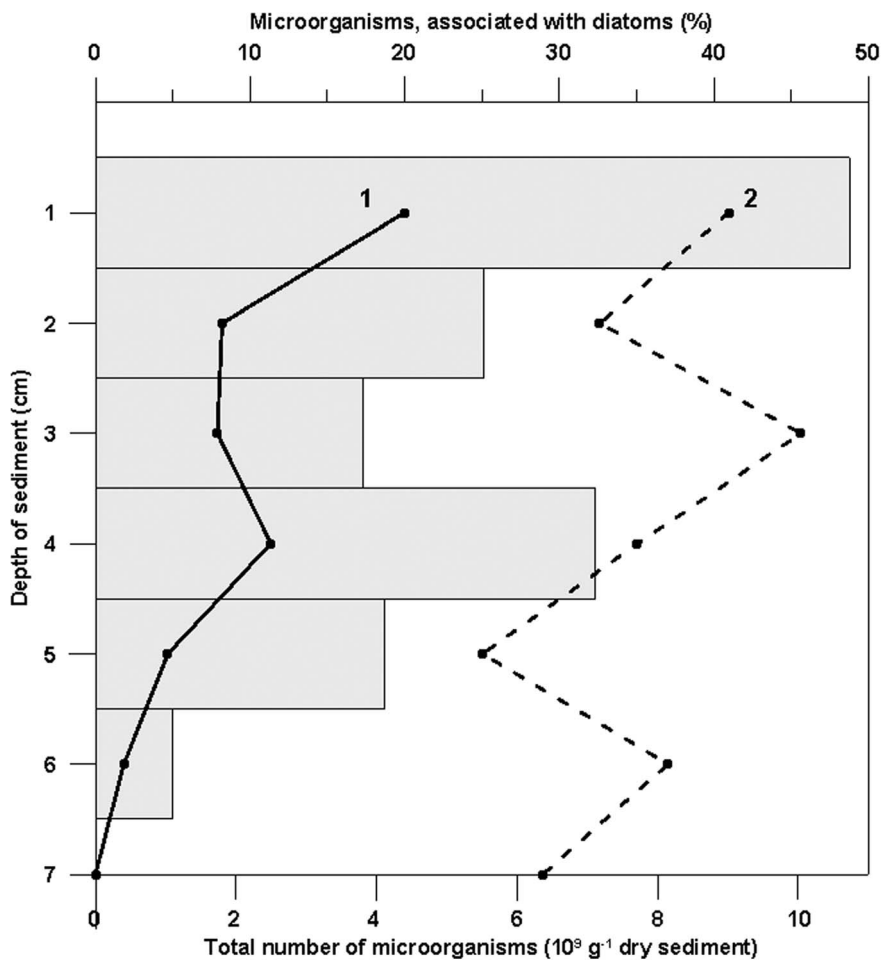

**Figure 2. Vertical distribution of microorganisms in bottom sediments of Lake Baikal.** (1) Number of diatom-associated bacteria, (2) total number of microorganisms.  
doi:10.1371/journal.pone.0059977.g002

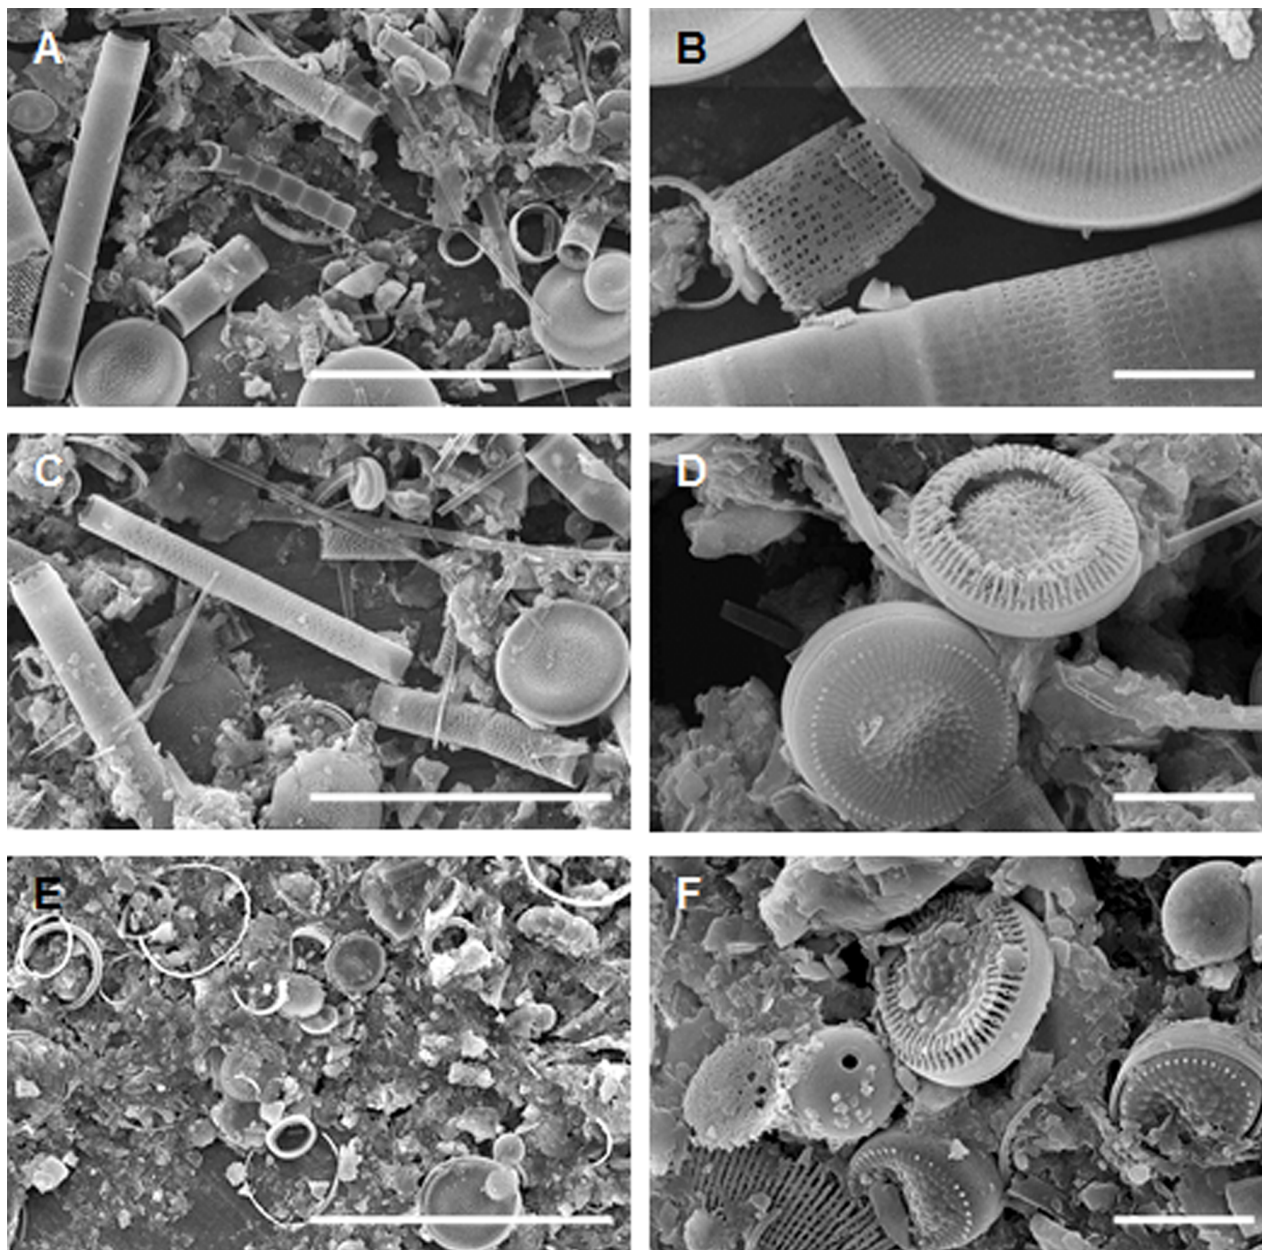

**Figure 3. Changes in the degree of preservation of diatom frustules in different layers of Lake Baikal bottom sediments.** (A, B) 0–1 cm. (C, D) 2–3 cm. (E, F) 6–7 cm. Scale bars: (A, C, E) 100 μm; (B, D, F) 10 μm.  
doi:10.1371/journal.pone.0059977.g003

**Table 2.** Sample coverage, species richness and species diversity indices.

| Genetic distance for OTU clustering | Good’s coverage | Number of OTUs | ACE                    | Chao1                  | Simpson’s Inverse Index |
|-------------------------------------|-----------------|----------------|------------------------|------------------------|-------------------------|
| 0.01                                | 0.93216         | 18 017         | 50 730 (49 846÷51 638) | 34 606 (33 723÷35 539) | 125.4 (123.0÷127.8)     |
| 0.03                                | 0.99985         | 5 224          | 5 231 (5 227÷5 240)    | 5 224 (5 224÷5 226)    | 67.9 (66.7÷69.0)        |
| 0.05                                | 0.99999         | 3 920          | 3 920 (3 920÷3 925)    | 3 920 (3 920÷3 920)    | 57.3 (56.5÷58.2)        |
| 0.07                                | 0.99999         | 3 132          | 3 132 (3 132÷3 132)    | 3 132 (3 132÷3 132)    | 47.0 (46.4÷47.7)        |

doi:10.1371/journal.pone.0059977.t002

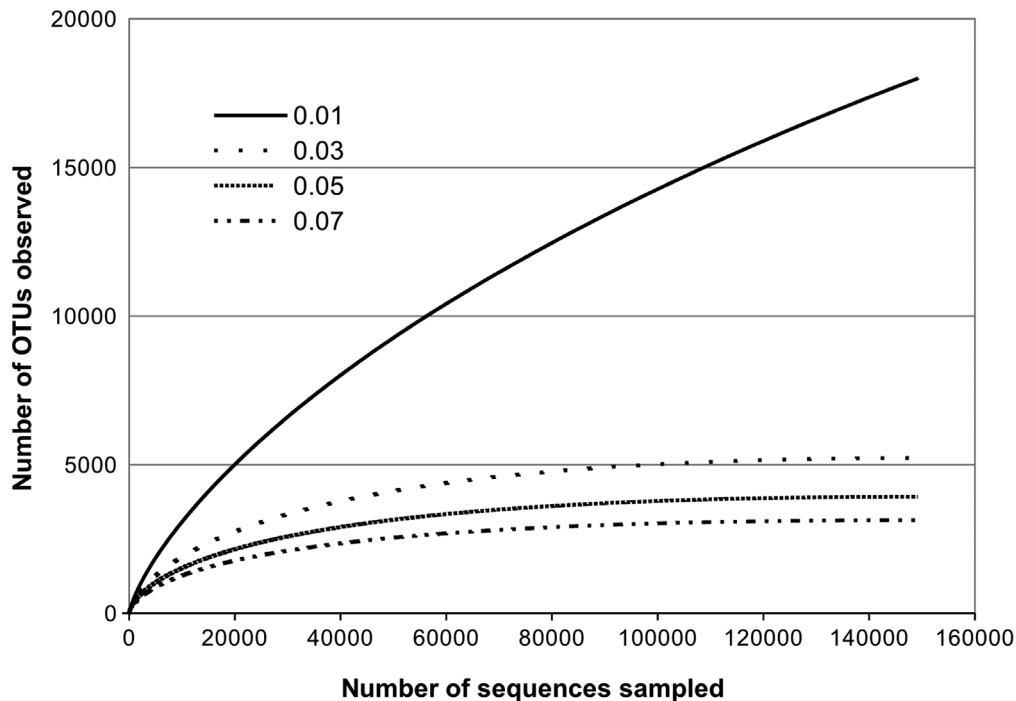

**Figure 4. Bacterial diversity in the near-bottom water layer of Lake Baikal, as characterized by rarefaction curves of OTUs defined at genetic distance levels of 0.01, 0.03, 0.05, and 0.07.**

doi:10.1371/journal.pone.0059977.g004

### Composition of Bacterial Community

As a result of taxonomic classification, approximately one-fourth of sequence reads comprising OTU<sub>0.03</sub> were identified to the genus level (Figure 5). Taxonomic identification of 18% of reads and 46% of OTU<sub>0.03</sub> ( $N = 27\,881$ ;  $S_{0.03} = 2426$ ) was possible only to the Bacteria domain. Selective tests of representative sequences from the OTUs that could only be assigned to high taxonomic ranks showed that they had BLAST homologies with 16S rRNA gene fragments sequenced in DNA samples from other bacterial communities. However, the reference database provided no information on the taxonomic position of these sequences, and more detailed identification of such reads was impossible.

As follows from the results shown in Figure 5, the bacterial community in the near-bottom water layer was dominated by the members of the phylum Proteobacteria, which accounted for 41.9% of all recorded 16S rRNA gene sequences. The class  $\alpha$ -Proteobacteria (5.7%) was represented mainly by bacteria of the genus *Pelagibacter* (about 1.3%) from the family SAR11 of the order Rickettsiales; of the genus *Caulobacter* from the family Caulobacteraceae (about 0.6%); of the order Sphingomonadales (0.9%), in which most sequences could not be identified to the genus level and only 0.2% were assigned to the genera *Sphingobium* and *Sphingomonas*; of the genus *Methylobacterium* (about 0.3%) from the family Methylobacteriaceae; and of the family Rhodobiaceae (about 0.4%). In addition, we identified microorganisms of the genus *Rhizobium* (0.2%) from the family Rhizobiaceae and of the genus *Rhodobacter* (0.2%) from the family Rhodobacteraceae. In the class  $\beta$ -Proteobacteria (about 14%), most sequences were classified with the order Burkholderiales (6.8%), including the genera *Burkholderia* (1.3%), *Acidovorax* (1.3%), *Methylibium* (0.2%), *Thiobacter* (0.6%), *Variovorax* (0.2%), and *Polynucleobacter* (0.2%); much smaller proportions of sequences were assigned to the orders Methylophilales (0.9%), Rhodocyclales (0.1%), and Neisseriales (less than 0.1%). In the class  $\gamma$ -Proteobacteria (17.2%), the dominant group

included bacteria of the genus *Halomonas* from the family Halomonadaceae (8.3%); of the genera *Escherichia/Shigella*, *Serratia* from the family Enterobacteriaceae (1.6%); of the genera *Acinetobacter* and *Enhydrobacter* of the family Moraxellaceae (1.2%); of the genus *Methylobacter* from the family Methylococcaceae (0.6%); and of the genus *Pseudomonas* from the family Pseudomonadaceae (about 0.4%). Approximately 3% of bacterial sequences were assigned to  $\delta$ -Proteobacteria, including the orders Bdellovibrionales (about 1%), Myxococcales (about 1%), Syntrophobacteriales (0.2%), and Desulfobacteriales (less than 0.1%).

The proportion of microorganisms from the phylum Actinobacteria reached 16%. They included bacteria of the genus *Ilumatobacter* from the family Acidimicrobiidae (6%) and representatives of the orders Actinomycetales (6.3%) and Solirubrobacteriales (about 0.9%) that were not identified in more detail.

The phylum Acidobacteria (6.9%) was represented by members of the orders Gp6 (4%), Gp4 (0.9%), Gp22 (0.7%), and Gp7 (0.4%) that were not identified to the genus level.

Representatives of the phylum Cyanobacteria accounted for about 5% of the community, almost all of them being assigned to the family GpIIa (5%).

In the phylum Firmicutes (2.8%), about 2.3% of sequences were assigned to the family Bacillaceae (including the genera *Caldalkalibacillus*, *Bacillus*, and *Oceanobacillus*) and about 0.3%, to the family Staphylococcaceae (*Staphylococcus*).

Microorganisms of the phylum Bacteroidetes comprised about 4.7% of the microbial community. These were mainly representatives of the order Flavobacteriales (1.2%), in which the genus *Flavobacterium* dominated, and of the order Sphingobacteriales (about 1.8%), including the families Chitinophagaceae, Cytophagaceae, and Sphingobacteriaceae.

Identified members of the phylum Nitrospira mostly belonged to the genus *Nitrospira* (about 1.6%). Approximately 1% of microorganisms were classified with the phylum Verrucomicrobia

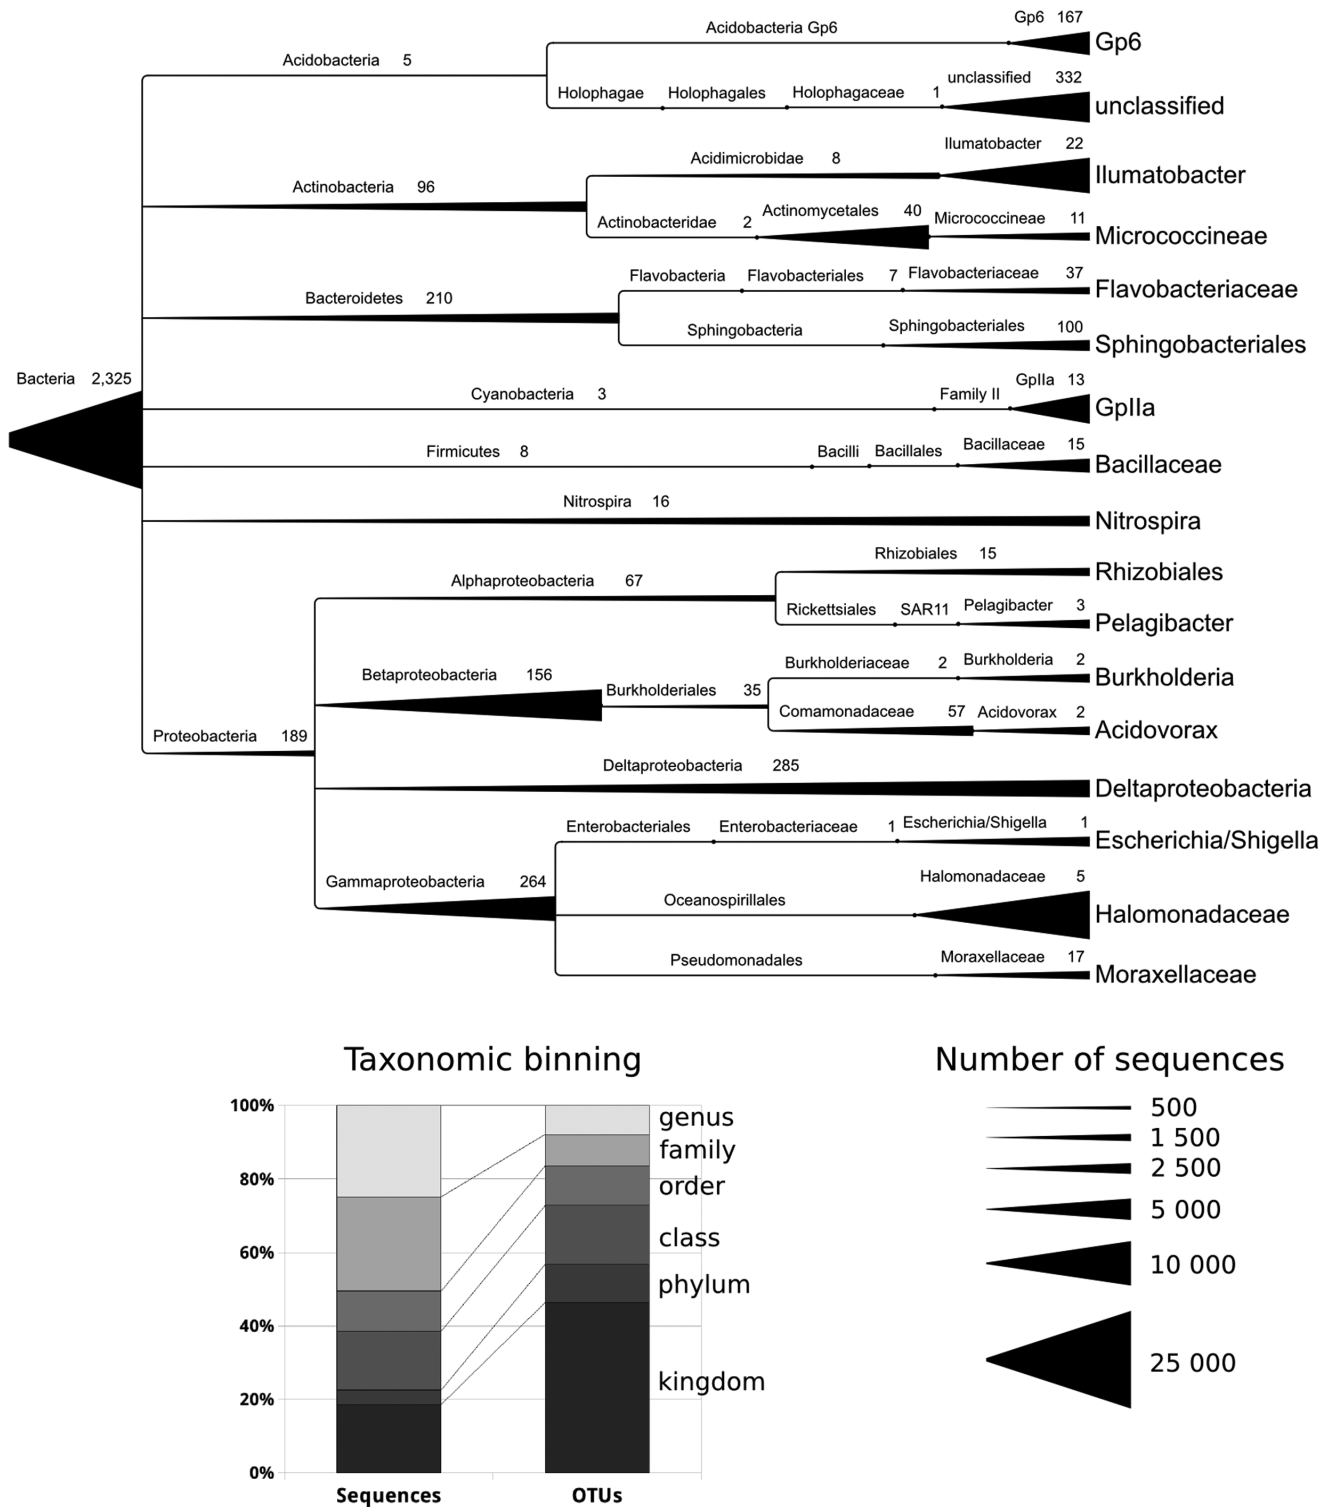

**Figure 5. The structure of bacterial community in the near-bottom water layer of Lake Baikal.** Every taxonomic group presented in the dendrogram accounted for no less than 1% of the total number of sequence reads, with the width of branches being proportional to the number of identified reads. Values at the nodes show the number of OTU<sub>0.03</sub> for a given taxon. The diagram at the bottom shows the proportions of OTU<sub>0.03</sub> assigned to taxa of different ranks.  
doi:10.1371/journal.pone.0059977.g005

and assigned to the genera *Luteolibacter*, *Prostheco bacter*, and *Haloferula* from the family Verrucomicrobiaceae and the genus *Opiritatus* from the family Opiritutaceae. Less than 1% of sequence

reads were assigned to each of the phyla Chloroflexi, TM7, and WS3, and less than 0.1%, to each of 14 other phylotypes: Planctomycetes, Chlamydiae, Deinococcus-Thermus, Gemmati-

monadetes, OD1, Spirochaetes, Fusobacteria, SR1, Caldiseica, Aquificae, Thermotogae, Deferribacteres, Tenerricutes, Lentiphaerae.

In our previous experiments [35], several bacterial strains possessing different hydrolytic activities were isolated from the near-bottom water layer by culturing on the medium containing diatom cell hydrolysate as the only source of organic matter. To estimate the degree to which these bacteria are represented in the metagenome of the bacterial community, we added their full-length 16S rRNA gene sequences into alignment of the pyrosequencing reads mapped to V3 hypervariable region. The relative abundance of isolate-specific pylotypes was calculated by dividing the corresponding phylotype richness to the number of sequences in the dominated phylotype belonging to Actinobacteria (Table 3). The results showed that clusters comprising gene sequences of *Sphingomonas rhizogenes* ( $N_{0.03} = 472$ ) – 10.6%, *Acinetobacter johnsonii* ( $N_{0.03} = 425$ ) – 9.6%, *Brevundimonas bullata* ( $N_{0.03} = 412$ ) – 9.3%, *Methylobacterium adhaesivum* ( $N_{0.03} = 401$ ) – 9%, *Agrobacterium tumefaciens* ( $N_{0.03} = 171$ ) – 3.9% were represented in the metagenome at a medium level, while clusters of *Bacillus simplex* ( $N_{0.03} = 10$ ) – 0.2% and *Deinococcus aquaticus* ( $N_{0.03} = 5$ ) – 0.1% were minor.

According to the results of BLASTN screening, the closest relatives of the identified sequences have been revealed in other aquatic ecosystems and in the soil (Table 3), which is evidence that these bacteria may be involved in similar processes occurring in different ecosystems.

## Discussion

It has been shown that the abundance of bacteria in freshwater bottom sediments reaches a peak ( $1.4\text{--}8.7 \times 10^9$  cells/g air-dry weight) in the surface layer and decreases with depth [62]. According to our data, this parameters in the surface layer of Baikal bottom sediments amounted to  $10^{10}$  cells/g air dry weight, with the greater part of bacteria, both in the sediments and in the near-bottom water layer, being associated with diatom cells (Figures 1, 2). The results of DAPI staining show that diatoms in the near-bottom water layer are colonized by microorganisms, which affect both the organic matrix on the surface of frustules and the contents of diatom cells (Figures 1A, B). It appears from Figure 1A that bacteria degrade intracellular organic matter, which in *S. acus* subsp. *radians* consists half of polyunsaturated fatty acids [63] and contains chrysolaminarin as the main polysaccharide component [64].

As shown by Maksimenko *et al.* [65] using fluorescence *in situ* hybridization (FISH) with specific probes [66], diatom-associated bacteria from Lake Baikal waters belong to the classes of  $\alpha$ - and  $\beta$ -Proteobacteria, as do bacteria associated with marine planktonic diatoms [20]. Previous experiments involving comparative analysis of 16S rRNA gene clonal libraries generated from lake bacterioplankton [67] failed to provide a complete picture of taxonomic diversity in the microbial communities but allowed the authors to reveal seven sequences with a relatively high degree of similarity (85.8–94.3%) to those of  $\alpha$ -Proteobacteria,  $\beta$ -Proteobacteria,  $\gamma$ -Proteobacteria, and Actinobacteria in samples from deep waters of Middle Baikal.

According to the results of metagenomic analysis of microbial community from the deep near-bottom water layer, where diatoms settling from the water column concentrate, this community is characterized by very high taxonomic diversity, despite specific features of its ecological niche (great depth and permanently low water temperature). It may well be that this diversity is provided for by variation in the species composition of diatoms, since their

dominant groups in the Baikal phytoplankton change every year and diatoms may arrive to the bottom while still alive (at least partly) due to vertical water exchange events.

Most of 149 208 unique sequences revealed in the metagenome of this community have been identified to the family or genus level. The results of their taxonomic classification show that the bulk of the community is composed by representatives of two phylotypes, Proteobacteria and Actinobacteria (Figure 5). The identified microorganisms are mainly organotrophs with different metabolic strategies that commonly occur together in different ecological niches. Known representatives of the dominant classes of  $\alpha$ -,  $\beta$ -, and  $\gamma$ -Proteobacteria are aerobes or facultative anaerobes utilizing organic compounds, including proteins and polysaccharides, as a source of energy [68]. According to BLASTN data analysis, their closest relatives (95–100% similarity in 16S rRNA gene sequence) occur in freshwater and marine ecosystems, lake deposits, soils, and as symbionts of eukaryotes (Table 3). Most members of Actinobacteria, the second most abundant phylotype, are also organotrophic bacteria whose functional role generally consists in decomposing complex, poorly accessible substrates at later stages of microbial succession; in addition, they are possibly involved in the synthesis and decomposition of humic substances [69]. Phylogenetically close microorganisms of this group (100% similarity in 16S rRNA gene sequence) have been identified from other lake ecosystems (Table 3).

As shown in our previous study [35], isolates of *Brevundimonas bullata*, *Sphingomonas rhizogenes*, *Agrobacterium tumefaciens*, *Methylobacterium adhaesivum*, *Acinetobacter johnsonii*, *Bacillus simplex*, and *Deinococcus aquaticus* from the near-bottom Baikal water have an algicidal effect on the diatom *S. acus* and possess protease,  $\beta$ -xylosidase,  $\beta$ -glucosidase,  $\beta$ -galactosidase, and chitinase activities. During joint cultivation of bacteria and the diatom *S. acus* we recorded inhibition of diatom growth in 4 days of incubation, whereas in 18 days siliceous frustules of *S. acus* became more brittle. Broken cells were detected in a drop under a light microscope and on a SEM slide (Figure 6). However, the degradation of diatom frustules has not been observed in the axenic culture of diatoms. Pyrosequencing reads similar to 16S rRNA gene sequences of these isolates have also been found in the metagenome of the near-bottom microbial community. Frustules of diatoms affected by bacterial hydrolytic enzymes are very brittle and easily break up even when being dried to prepare samples for SEM analysis, and the bottom sediments at a depth of 6–7 cm usually contain only macerated fragments of the frustules (Figures 3G, 3I). The involvement of bacteria in diatom degradation is indirectly confirmed by data shown in Figure 2: the proportion of bacteria associated with diatom cells in the upper layer of bottom sediments (0–7 cm) gradually decreases with depth.

However, the trend that the degree of diatom preservation decreases with depth does not apply to all Baikal diatom records. For example, Bezrukova *et al.* [70] observed that postglacial diatom sediments were strongly diluted with terrigenous material in which well-preserved diatom frustules could be found. An episode of high-rate burial of *S. acus* diatoms, which accounted for a high degree of frustule preservation, took place in the mid-Holocene [71]. Experiments on hydrogen peroxide treatment of samples from the upper sediment layer provided a basis for the conclusion that the degree of frustule preservation in bottom sediments depends on the depth of the overlying water column [21]. However, this conclusion should be revised in the light of recent data based on microscopic analysis of numerous core samples. They show that, even within the same core taken from a certain depth, the degree of diatom preservation may vary between sediment layers formed during different time periods;



**Table 3.** The bacteria from the GenBank database most closely related, according to 16S rRNA gene sequences identified from deep near-bottom layer of Lake Baikal.

| Phylotype        | Number of sequences | Closest relative                                                                                                                                                                                                                               | Accession no                                                                                                          | % Similarity                                                                                                                                           | Location, setting                                                                                                                                                       |                                                                                                     |                                                                                                                       |
|------------------|---------------------|------------------------------------------------------------------------------------------------------------------------------------------------------------------------------------------------------------------------------------------------|-----------------------------------------------------------------------------------------------------------------------|--------------------------------------------------------------------------------------------------------------------------------------------------------|-------------------------------------------------------------------------------------------------------------------------------------------------------------------------|-----------------------------------------------------------------------------------------------------|-----------------------------------------------------------------------------------------------------------------------|
| α-Proteobacteria | 171                 | <i>Rhizobium</i> sp. <i>Agrobacterium tumefaciens</i>                                                                                                                                                                                          | FR870233<br>JF700414                                                                                                  | 100 100                                                                                                                                                | Different plant species Rhizosphere of tomato plant                                                                                                                     |                                                                                                     |                                                                                                                       |
|                  | 401                 | <i>Methylobacterium</i> sp.<br><i>Methylobacterium podarium</i>                                                                                                                                                                                | JF905617<br>HQ220089                                                                                                  | 100 100                                                                                                                                                | Soil of Barrientos Island Citrus roots in Florida                                                                                                                       |                                                                                                     |                                                                                                                       |
|                  | 412                 | <i>Caulobacter</i> sp. <i>Brevundimonas diminuta</i>                                                                                                                                                                                           | JF905609<br>HQ857771                                                                                                  | 100 100                                                                                                                                                | Soil of Barrientos Island Bacterial soil communities                                                                                                                    |                                                                                                     |                                                                                                                       |
|                  | 472                 | <i>Sphingomonas</i> sp.                                                                                                                                                                                                                        | HM447771                                                                                                              | 100                                                                                                                                                    | Agricultural soil                                                                                                                                                       |                                                                                                     |                                                                                                                       |
|                  | 762                 | Uncultured α-Proteobacteria<br>Proteobacterium                                                                                                                                                                                                 | Uncultured SAR11<br>α-HQ532193<br>HM856580                                                                            | 100 100                                                                                                                                                | Epilimnion from Brandy Lake Yellowstone Lake, USA                                                                                                                       |                                                                                                     |                                                                                                                       |
|                  | 67                  | Uncultured Rhodobacteraceae bacterium                                                                                                                                                                                                          | EU642175                                                                                                              | 99                                                                                                                                                     | Lake Michigan                                                                                                                                                           |                                                                                                     |                                                                                                                       |
| β-Proteobacteria | 112                 | Uncultured <i>Methylibium</i> sp.                                                                                                                                                                                                              | EU512961                                                                                                              | 97                                                                                                                                                     | Creosote contaminated soil                                                                                                                                              |                                                                                                     |                                                                                                                       |
|                  | 138                 | Uncultured <i>Burkholderiaceae</i> bacterium                                                                                                                                                                                                   | AM936595                                                                                                              | 96                                                                                                                                                     | Hydrocarbon-contaminated soil                                                                                                                                           |                                                                                                     |                                                                                                                       |
|                  | 91                  | Uncultured <i>Acidovorax</i> sp.                                                                                                                                                                                                               | JF460954                                                                                                              | 100                                                                                                                                                    | Drinking water, USA                                                                                                                                                     |                                                                                                     |                                                                                                                       |
|                  | 169                 | Uncultured <i>Curvibacter</i> sp.                                                                                                                                                                                                              | HQ008595                                                                                                              | 99                                                                                                                                                     | Argentine freshwater reservoir                                                                                                                                          |                                                                                                     |                                                                                                                       |
| γ-Proteobacteria | 645                 | <i>Halomonas nitritophilus</i>                                                                                                                                                                                                                 | GU113002                                                                                                              | 100                                                                                                                                                    | Mud volcano soil, China                                                                                                                                                 |                                                                                                     |                                                                                                                       |
|                  | 206                 | <i>Halomonas</i> sp.                                                                                                                                                                                                                           | AY962237                                                                                                              | 100                                                                                                                                                    | Soda Lakes                                                                                                                                                              |                                                                                                     |                                                                                                                       |
|                  | 690                 | Uncultured Enterobacteriaceae bacterium<br><i>Escherichia coli</i>                                                                                                                                                                             | JF703628<br>HQ219946                                                                                                  | 100 100                                                                                                                                                | Root and rhizosphere soil Rhizosphere of plant                                                                                                                          |                                                                                                     |                                                                                                                       |
|                  | 146                 | <i>Serratia</i> sp.                                                                                                                                                                                                                            | HQ694786                                                                                                              | 100                                                                                                                                                    | Sudbury River sediment soil                                                                                                                                             |                                                                                                     |                                                                                                                       |
|                  | 425 425             | <i>Acinetobacter johnsonii</i> <i>Acinetobacter</i> sp.                                                                                                                                                                                        | JF915343<br>JF421722                                                                                                  | 100 100                                                                                                                                                | Microbiota of freshwater salmon Fish surface mucus                                                                                                                      |                                                                                                     |                                                                                                                       |
|                  | 83                  | <i>Aeromonas sobria</i> <i>Pseudomonas putida</i>                                                                                                                                                                                              | HM244939<br>AF182028                                                                                                  | 100 99                                                                                                                                                 | Microbiota of freshwater salmon Sea bacterial plankton                                                                                                                  |                                                                                                     |                                                                                                                       |
|                  | 98                  | <i>Alcanivorax</i> sp.                                                                                                                                                                                                                         | JF304812                                                                                                              | 99                                                                                                                                                     | Bacterial soil communities                                                                                                                                              |                                                                                                     |                                                                                                                       |
| δ-Proteobacteria | 402                 | Uncultured <i>Syntrophobacteriales</i> bacterium                                                                                                                                                                                               | AM935385                                                                                                              | 99                                                                                                                                                     | Hydrocarbon-contaminated soil                                                                                                                                           |                                                                                                     |                                                                                                                       |
|                  | 86                  | Uncultured <i>Desulfovibrionales</i> bacterium                                                                                                                                                                                                 | AM936790                                                                                                              | 95                                                                                                                                                     | Hydrocarbon-contaminated soil                                                                                                                                           |                                                                                                     |                                                                                                                       |
| Actinobacteria   | 4447                | Uncultured bacterium<br>Uncultured bacterium<br>Uncultured bacterium<br>Uncultured bacterium<br>Uncultured actinobacterium<br>Uncultured actinobacterium<br>Uncultured <i>Acidimicrobinae</i> bacterium<br>Uncultured <i>Ilumatobacter</i> sp. | HQ625559<br>HQ905270<br>FR696973<br>AB594277<br>DQ316383<br>HQ532565<br>HM856389<br>HM346318                          | 100 100 100<br>100 100 100<br>100 100                                                                                                                  | Water of Lake<br>Lake Taihu, China<br>Lake Redon, Spain<br>Lake Biwa, Japan<br>Lake Stechlin, Germany<br>Crystal Lake<br>Yellowstone Lake, USA<br>Yellowstone Lake, USA |                                                                                                     |                                                                                                                       |
|                  | 143                 | Uncultured <i>Acidobacteria</i> bacterium                                                                                                                                                                                                      | AM935828                                                                                                              | 99                                                                                                                                                     | Hydrocarbon-contaminated soil                                                                                                                                           |                                                                                                     |                                                                                                                       |
|                  | 518                 | Uncultured <i>Acidobacteria</i> bacterium                                                                                                                                                                                                      | DQ648911                                                                                                              | 98                                                                                                                                                     | PCB contaminated soil                                                                                                                                                   |                                                                                                     |                                                                                                                       |
|                  | 349                 | Uncultured <i>Acidobacteria</i> bacterium<br>Uncultured <i>Acidobacteria</i> bacterium<br>Uncultured <i>Acidobacteria</i> bacterium                                                                                                            | GU9988880<br>EF664105<br>DQ828480                                                                                     | 98 99 97                                                                                                                                               | Superficial sediment of Lake Taihu<br>Bacterial soil communities<br>Agricultural soil                                                                                   |                                                                                                     |                                                                                                                       |
|                  | Cyanobacteria       | 3400                                                                                                                                                                                                                                           | <i>Cyanobium</i> sp.<br>Uncultured cyanobacterium<br>Uncultured cyanobacterium<br>Uncultured <i>Synechococcus</i> sp. | HQ832914<br>EU641645<br>AM411878<br>DQ519782                                                                                                           | 100 100 99<br>100                                                                                                                                                       | Lavadores Beach, Portugal<br>Lake Michigan, USA<br>Lake Blaarmeersen, Belgium<br>Lake Superior, USA |                                                                                                                       |
|                  |                     | Firmicutes                                                                                                                                                                                                                                     | 1395                                                                                                                  | Uncultured <i>Geobacillus</i> sp.                                                                                                                      | AB594275                                                                                                                                                                | 100                                                                                                 | Lake Biwa water in reed community                                                                                     |
|                  |                     |                                                                                                                                                                                                                                                | 503                                                                                                                   | <i>Caldalkalibacillus thermanum</i><br><i>Caldalkalibacillus uzonensis</i><br><i>Bacillus</i> sp.<br><i>Geobacillus</i> sp.<br><i>Bacillus smithii</i> | AY753654<br>DQ221694<br>AB043863<br>FJ4295900<br>FJ572204                                                                                                               | 100 98 100<br>94 99                                                                                 | Hot spring in China<br>Hot spring in Kamchatka<br>Hot spring in Turkey<br>Hot spring in Turkey<br>Hot spring in India |
| Bacteroidetes    |                     |                                                                                                                                                                                                                                                | 545                                                                                                                   | <i>Flavobacterium</i> sp.                                                                                                                              | FR682718                                                                                                                                                                | 100                                                                                                 | Soil sample East Antarctica                                                                                           |
|                  | 45                  |                                                                                                                                                                                                                                                | <i>Flavobacterium</i> sp.<br><i>Flavobacterium</i> sp. uncultured<br>Bacteroidetes bacterium                          | FR696351<br>GU932945<br>GQ469486                                                                                                                       | 97 99 98                                                                                                                                                                | River water, Finland<br>Water High Arctic<br>Agricultural soil communities                          |                                                                                                                       |
|                  | 84                  | Uncultured Bacteroidetes bacterium                                                                                                                                                                                                             | EF020181                                                                                                              | 99                                                                                                                                                     | Rhizosphere of plant                                                                                                                                                    |                                                                                                     |                                                                                                                       |

**Table 3.** Cont.

| Phylotype       | Number of sequences | Closest relative                  | Accession no | % Similarity | Location, setting        |
|-----------------|---------------------|-----------------------------------|--------------|--------------|--------------------------|
| Verrucomicrobia | 84                  | <i>Verrucomicrobia</i> bacterium  | HM856577     | 100 99 100   | Yellowstone Lake, USA    |
|                 |                     | <i>Verrucomicrobium</i> sp.       | FN668203     | 98           | Lake Zurich, Switzerland |
|                 |                     | Uncultured bacterium              | AY752095     |              | Pavin Lake, France       |
|                 |                     | <i>Verrucomicrobiae</i> bacterium | EF520638     |              | Adirondack Lake, USA     |

doi:10.1371/journal.pone.0059977.t003

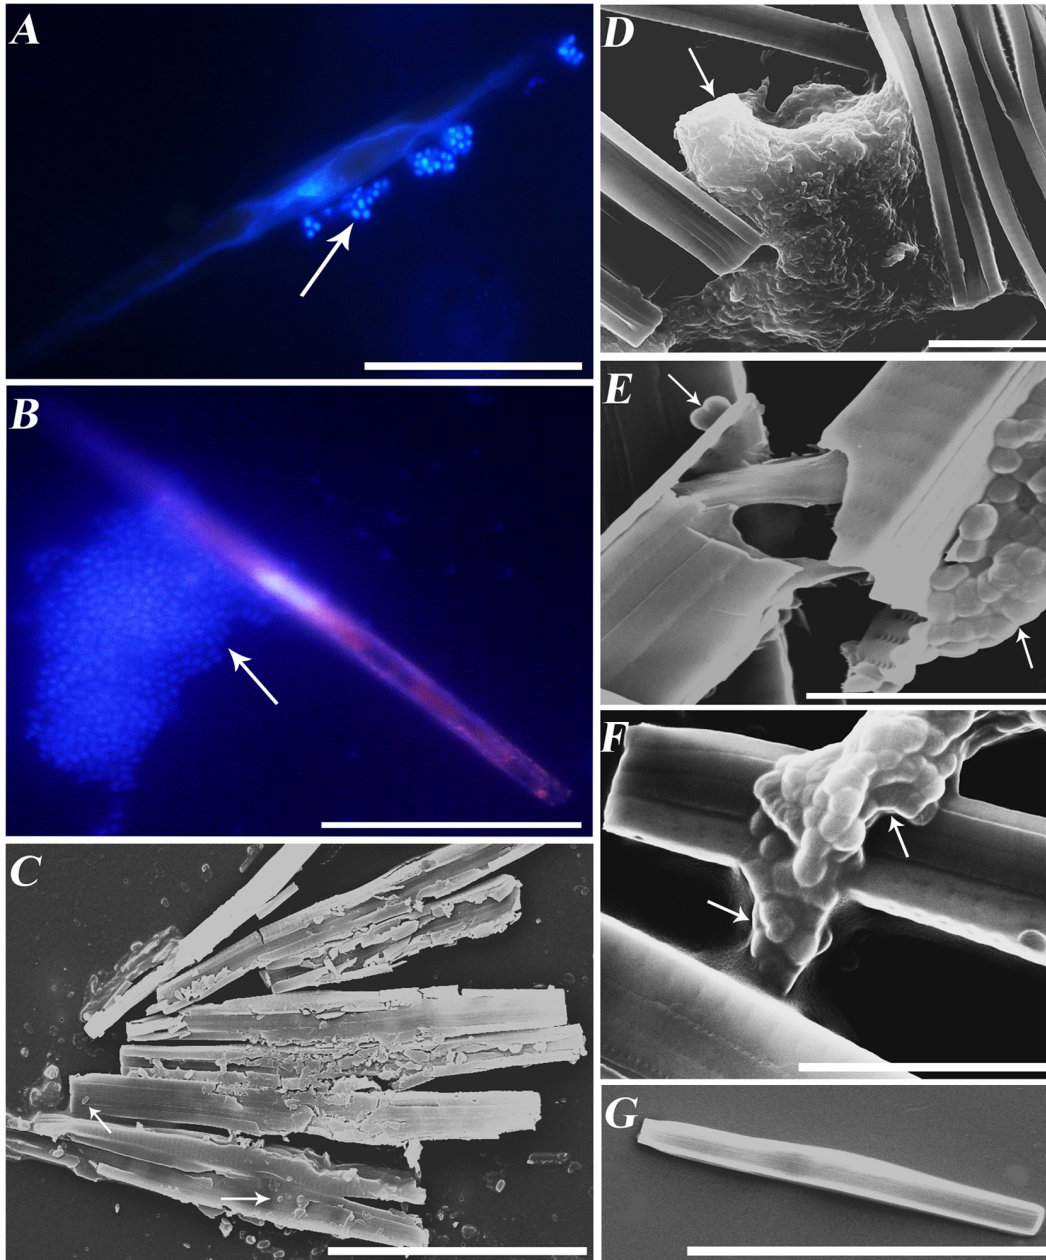

**Figure 6. Bacterial isolates associated with the laboratory culture of *S. acus*.** *A. johnsonii* BW65UT1570 (A, F), *M. adhaesivum* BW66UT1570 (B), *A. tumefaciens* BW62UT1570 (D). The degraded siliceous frustules of diatom *S. acus* in cocultures with *B. simplex* BW64UT1570 (C), *A. johnsonii* BW65UT1570 (E). Axenic culture *S. acus* (G). Epifluorescent microscopy, DAPI staining (A, B); scanning electron microscopy (D, E, F, G). Scale bar: A, B and G, 50  $\mu$ m; C, 40  $\mu$ m; D, 10  $\mu$ m; E, F, 5  $\mu$ m.  
doi:10.1371/journal.pone.0059977.g006

moreover, this parameter in the Pleistocene–Holocene cores shows no correlation with the age of sediments.

Reconstructions of hydrophysical conditions in Lake Baikal during the Late Pleistocene and Holocene [72] provide evidence for the possibility of radical changes in the hydrologic regime of the lake over the past 20 000 years, especially during glacial periods, when not only the duration of ice cover was longer and water temperature was lower, but also the pattern of vertical water mixing was probably different: the lake was monomictic rather than dimictic as it is today. Changes in the freeze-up period, variation in hydrologic conditions during the Late Pleistocene and Holocene [72], decline in phytoplankton production during glacial periods [73], increasing water turbidity and dilution of diatom flux by terrigenous runoff during the abrupt postglacial warming [69] along with possible changes in the pattern of deep-water renewal [74,75] created different conditions for the development, settling, and burial of diatoms and, therefore, for algal-bacterial interactions. In our opinion, minimum contact with bacteria in the course of settling and burial is the main factor providing for a high degree of diatom preservation in Baikal sediments.

## Conclusion

Thus, diatoms inhabiting the deep near-bottom water layer and the upper sediment layer are colonized by bacteria that utilize the remaining organic algal material. Samples were collected from the near-bottom layer a month later after active growth of *S. acus*

subsp. *radians* which occurs at certain periodicity. Metagenomic analysis revealed high taxonomic diversity of bacteria despite a peculiar characteristic of the ecological niche (large depth and constant low temperature). This diversity is likely to be attributed to the change of species composition of diatoms, the dominant complexes of which are replaced in phytoplankton of Lake Baikal every year, and the vertical water mixing makes living diatoms episodically settle to the bottom. Algicidal effect of bacterial isolates on *S. acus* subsp. *radians* and the presence of pyrosequencing reads similar to nucleotide sequences of these isolates attest that under natural conditions the bacterial community can degrade extracellular and intracellular organic matter of diatoms, thus accelerating processes of dissolution of biogenic silica.

## Acknowledgments

The authors are thankful to O.S. Kravchenko and V.G. Ivanov for their help in water sampling; N.A. Gorgolyuk for critical reading of the manuscript.

## Author Contributions

Conceived and designed the experiments: YVL YRZ. Performed the experiments: YRZ MIK DPP AVL NVR AVM AVB. Analyzed the data: YRZ YPG MIK SMS. Contributed reagents/materials/analysis tools: YVL NVR. Wrote the paper: YRZ YPG YVL.

## References

- Biddanda BA, Pomeroy LR (1988) Microbial aggregation and degradation of phytoplankton-derived detritus in seawater: 1. Microbial succession. *Mar Ecol Progr Ser* 42: 79–88.
- Smith DC, Steward GF, Long RA, Azam F (1995) Bacterial utilization of carbon fluxes during a diatom bloom in a mesocosm. *Deep Sea Res* 42: 75–97.
- Smith DC, Simon M, Alldredge AL, Azam F (1992) Intense hydrolytic enzyme activity on marine aggregates and implication for rapid particle dissolution. *Nature* 359: 139–142.
- Cole JJ, Findlay S, Pace ML (1988) Bacterial production in fresh and saltwater ecosystems: A cross-system overview. *Mar Ecol Progr Ser* 43: 1–10.
- Fogg GE (1983) The ecological significance of extracellular products of phytoplankton photosynthesis. *Bot Mar* 26: 3–14.
- Smith D, Underwood GJC (1998) Exopolymer production by intertidal epipelagic diatoms. *Limnol Oceanogr* 43: 1578–1591.
- Taylor IS, Paterson DM (1998) Microspatial variation in carbohydrate concentrations with depth in the upper millimeters of intertidal cohesive sediments. *Estuar Coast Shelf Sci* 46: 359–370.
- Mykkestad SM (1995) Release of extracellular products by phytoplankton with special emphasis on polysaccharides. *Sci Tot Environ* 165: 155–164.
- Wustman BA, Gretz MR, Hoagland KD (1997) Extracellular matrix assembly in diatoms (BACILLARIOPHYCEAE): 1. A model of adhesives based on chemical characterization and localization of polysaccharides from the marine diatom *Achnanthes longipes* and other diatoms. *Plant Physiol* 113: 1059–1069.
- Brouwer J, Stal LJ (2002) Daily fluctuations of exopolymers of the benthic diatoms *Cylindrotheca fusiformis* and *Nitzschia* sp. (BACILLARIOPHYCEAE). *J Phycol* 38: 464–472.
- Bhosle NB, Sawant SS, Garg A, Wagh AB (1995) Isolation and partial chemical analysis of exopolysaccharides from the marine fouling diatom *Navicula subinflata*. *Bot Mar* 38: 103–110.
- Alekseeva SA, Shevchenko NM, Kusaykin MI, Ponomarenko LP, Isakov VV, et al. (2005) Polysaccharides of diatoms occurring in Lake Baikal. *Appl Biochem Microbiol* 41: 185–191.
- Bahulikar RA, Kroth PG (2007) Localization of EPS components secreted by freshwater diatoms using differential staining with fluorophore-conjugated lectins and other fluorochromes. *Eur J Phycol* 42: 199–208.
- Mague TH, Friberg E, Hughes DJ, Morris I (1980) Extracellular release of carbon by marine phytoplankton: A physiological approach. *Limnol Oceanogr* 25: 262–279.
- Patric S, Holdin AJ (1985) The effect of bacteria on the solubilization of silica in diatom frustules. *J Appl Bacteriol* 59: 7–16.
- Bruckner CG, Bahulikar R, Rahalkar M, Schink B, Kroth PG (2008) Bacteria associated with benthic diatoms from lake Constance: Phylogeny and influences on diatom growth and secretion of extracellular polymeric substances. *Appl Environ Microbiol* 74: 7740–7749.
- Volcani BE (1981) Cell wall formation in diatoms: Morphogenesis and biochemistry. In: Simpson TL, Volcani BE, editors. *Silicon and Siliceous Structures in Biological Systems*. New York: Springer-Verlag 157–200.
- Bidle KD, Azam F (2001) Bacterial control of silicon regeneration from diatom detritus: Significance of bacterial ectohydrolases and species identity. *Limnol Oceanogr* 46: 1606–1623.
- Bidle KD, Azam F (1999) Accelerated dissolution of diatom silica by marine bacterial assemblages. *Nature* 397: 508–512.
- Bidle KD, Brzezinski MA, Long RA, Jones JL, Azam F (2003) Diminished efficiency in the oceanic silica pump caused by bacteria-mediated silica dissolution. *Limnol Oceanogr* 48: 1855–1868.
- Flower RJ (1993) Diatom preservation: Experiments and observations on dissolution and breakage in modern and fossil material. *Hydrobiol* 269/270: 473–484.
- Mackay AW, Battarbee RW, Flower RJ, Jewson D, Lees JA, et al. (2000) The deposition and accumulation of endemic planktonic diatoms in the sediments of Lake Baikal and an evaluation of their potential role in climate reconstruction during the Holocene. *Terra Nostra* 9: 34–48.
- Battarbee RW, Mackay AW, Jewson DH, Ryves DB, Sturm M (2005) Differential dissolution of Lake Baikal diatoms: Correction factors and implications for palaeoclimatic reconstruction. *Glob Planet Change* 46: 75–86.
- Likhoshway EV, Pomazkina GV, Kostyukovskaya AO, Sergeeva VN, Levina OV (2005) Distribution of diatoms in surface sediments of Lake Baikal. *Geol Geophys* 46: 34–49. [In Russian].
- Stoermer JP, Edlund MB, Pilskaln CH, Schelske CL (1995) Siliceous microfossil distribution in the surficial sediments of Lake Baikal. *J Paleolimnol* 14: 69–82.
- Mackay AW, Ryves DB, Morley DW, Jewson DH, Rioual P (2006) Assessing the vulnerability of endemic diatom species in Lake Baikal to predicted future climate change: A multivariate approach. *Global Change Biol* 12: 2297–2315.
- Ryves DB, Battarbee RW, Flower RJ, Jewson D, Rioual P, et al. (2003) 1000 years of climate variability in central Asia: Assessing the evidence using Lake Baikal (Russia) diatom assemblages and the application of a diatom-inferred model of snow cover on the lake. *Glob Planet Change* 46: 281–297.
- Bradbury JP, Bezrukova YeV, Chernyaeva GP, Colman SM, Khursevich G, et al. (1994) A synthesis of post-glacial diatom records from Lake Baikal. *J Paleolimnol* 10: 213–252.
- Edlund MB, Stoermer EF (2000) A 200,000-year, high-resolution record of diatom productivity and community makeup from Lake Baikal shows high correspondence to the marine oxygen-isotope record of climate change. *Limnol Oceanogr* 45: 948–962.
- Likhoshway YV, Kuzmina AY, Potyemkina TG, Potyemkin VL, Shimaraev MN (1996) The distribution of diatoms near a thermal bar in Lake Baikal. *J Great Lakes Res* 22: 5–14.
- Grachev MA, Vorobyova SS, Likhoshway EV, Goldberg EL, Ziborova GA, et al. (1998) A high resolution diatom record of the palaeoclimates of East Siberia for the last 2.5 My from Lake Baikal. *Quat Sci Rev* 17: 1101–1106.

32. Khursevich GK, Karabanov EB, Prokopenko AA, Williams DF, Kuzmin MI, et al. (2001) Detailed diatom biostratigraphy of Baikal sediments during the Brunhes chron and climatic factors of species formation. *Geol Geophys* 42: 108–129. [In Russian].
33. Rioual P, Mackay AW (2005) A diatom record of centennial resolution for the Kazantsevo Interglacial stage in Lake Baikal (Siberia). *Glob Planet Change* 46: 199–219.
34. Grachev MA, Likhoshway YV, Colman SM, Kuzmina AE (1996) Measurement of the diatom sedimentation flux in Lake Baikal by means of automatic sediment traps. *Dokl Ross Akad Nauk* 350: 1066–1069. [In Russian].
35. Zakharova YR, Kurilkina MI, Likhoshway AV, Shishlyannikov SM, Kalyuzhnaya OV, et al. (2013) Effect of bacteria from the near-bottom water layer of Lake Baikal on degradation of diatoms. *Palaeontol J* 47 (in press).
36. Riemann L, Steward GF, Azam F (2000) Dynamics of bacterial community composition and activity during a mesocosm diatom bloom. *Appl Environ Microbiol* 66: 578–587.
37. Fandino LB, Riemann L, Steward GF, Long RA, Azam F (2001) Variations in bacterial community structure during a dinoflagellate bloom analyzed by DGGE and 16S rDNA sequencing. *Aquat Microb Ecol* 23: 119–130.
38. Grossart HP, Levold F, Allgaier M, Simon M, Brinkhoff T (2005) Marine diatom species harbour distinct bacterial communities. *Environ Microbiol* 7: 860–873.
39. Wooley JC, Godzik A, Friedberg I (2010) A Primer on Metagenomics. *PLoS Comput Biol* 6(2): e1000667. doi:10.1371/journal.pcbi.1000667.
40. Sogin ML, Morrison HG, Huber JA, Welch DM, Huse SM, et al. (2006) Microbial diversity in the deep sea and the underexplored “rare biosphere.” *Proc Natl Acad Sci USA* 103: 12115–1212.
41. Kim BS, Kim KB, Lee JH, Kim M, Lim YW, et al. (2008) Rapid phylogenetic dissection of prokaryotic community structure in tidal flat using pyrosequencing. *J Microbiol* 46: 357–363.
42. Gilbert JA, Fild D, Swift P, Newbold L, Oliver A, et al. (2009) The seasonal structure of microbial communities in the Western English Channel. *Environ Microbiol* 11: 3132–3139.
43. Mitra S, Gilbert JA, Field D, Huson DH (2010) Comparison of multiple metagenomes using phylogenetic networks based on ecological indices. *ISME J* 4: 1236–1242.
44. Mitra S, Rupsek P, Richter DC, Urich T, Gilbert JA (2011) Functional analysis of metagenomes and metatranscriptomes using SEED and KEGG. *BMC Bioinform* 12: S21.
45. Miller SR, Strong AL, Jones KL, Ungerer MC (2009) Barcoded pyrosequencing reveals shared bacterial community properties along the temperature gradients of two alkaline hot springs in Yellowstone National Park. *Appl Environ Microbiol* 75: 4565–4572.
46. Gumerov VM, Mardanov AV, Beletsky AV, Bonch-Osmolovskaya EA, Ravin NV (2011) Molecular analysis of microbial diversity in the Zavarzin Spring, Uzon Caldera, Kamchatka. *Microbiol* 80: 244–251.
47. Kalyuzhnaya MG, Lapidus A, Ivanova N, Copeland AC, McHardy A, et al. (2008) High-resolution metagenomics targets specific functional types in complex microbial communities. *Nature Biotechnol* 26: 1029–1034.
48. Kadnikov VV, Mardanov AV, Shubenkova OV, Pogodaeva TV, Zemskaya TI, et al. (2012) Microbial community structure in the methane hydrate-bearing sediments of freshwater Lake Baikal. *FEMS Microbiol Ecol* 79: 348–358.
49. Pernthaler J, Glöckner FO, Schönhuber W, Amann R (2001) Fluorescence in situ hybridization with rRNA-targeted oligonucleotide probes. In: Paul J, editor. *Methods in Microbiology: Marine Microbiology*. San Diego: Academic Press. 207–226.
50. Murray RGE, Doetsch RN, Robinow CF (1994) Determinative and cytological light microscopy. In: Gerhardt P, Murray RGE, Wood WA, Krieg NR, editors. *Methods for general and molecular bacteriology*. Washington, DC: Am. Soc. Microbiol. 21–41.
51. Glantz SA (1998) *Primer of Biostatistics*, 4th ed. New York: McGraw-Hill Publishing. 473 p.
52. Marmur JA (1961) Procedure for the isolation of deoxyribonucleic acid from microorganisms. *J Mol Biol* 3: 208–218.
53. Schloss PD, Westcott SL, Ryabin T, Hall JR, Hartmann M, et al. (2009) Introducing mothur: Open-source, platform-independent, community-supported software for describing and comparing microbial communities. *Appl Environ Microbiol* 75: 7537–7541.
54. Quince C, Lanzen A, Davenport RJ, Turnbaugh PJ (2011) Removing noise from pyrosequenced amplicons. *BMC Bioinform* 12: 38, doi:10.1186/1471-2105-12-38.
55. DeSantis TZ Jr, Hugenholtz P, Keller K, Brodie EL, Larsen N, et al. (2006) NAST: A multiple sequence alignment server for comparative analysis of 16S rRNA genes. *Nucleic Acids Res* 34: 394–399.
56. Edgar RC, Haas BJ, Clemente JC, Quince C, Knight R (2011) UCHIME improves sensitivity and speed of chimera detection. *Bioinformatics* doi: 10.1093/bioinformatics/btr381.
57. Wang Q, Garrity GM, Tiedje JM, Cole JR (2007) Naive Bayesian classifier for rapid assignment of rRNA sequences into the new bacterial taxonomy. *Appl Environ Microbiol* 73: 5261–5267.
58. Cole JR, Wang Q, Cardenas E, Fish J, Chai B (2009) The Ribosomal Database Project: Improved alignments and new tools for rRNA analysis. *Nucleic Acids Res* 37: 141–145.
59. Stöver BC, Müller KF (2010) Tree Graph 2: Combining and visualizing evidence from different phylogenetic analyses. *BMC Bioinform* 5: 11–17.
60. Hughes JB, Hellmann JJ, Ricketts TH, Bohannan BJ (2001) Counting the uncountable: statistical approaches to estimating microbial diversity. *Appl Environ Microbiol* 67(10): 4399–4406.
61. Altschul SF, Gish W, Miller W, Myers EW, Lipman DJ (1990) Basic local alignment search tool. *J Mol Biol* 215: 403–410.
62. Gerbersdorf SU, Bittner R, Lubarsky H, Manz W, Paterson DM (2009) Microbial assemblages as ecosystem engineers of sediment stability. *J Soils Sediments* 9: 640–652.
63. Vereshchagin AL, Glyzina OY, Basharina TN, Safonova TA, Latyshev NA, et al. (2008) Culturing of a fresh-water diatomic alga *Synedra acus* in a 100-l photobioreactor and analysis of biomass composition. *Biotechnol* 4: 77–90. [In Russian].
64. Kusaikin MI, Ermakova SP, Shevchenko NM, Isakov VV, Gorshkov AG, et al. (2010) Structural characteristics and antitumor activity of a new chrysolaminaran from the diatom alga *Synedra acus*. *Chem Natural Comp* 46: 1–4.
65. Maksimenko SYu, Likhoshway AIV, Zemskaya TI (2006) Studies of the microorganisms associated with the siliceous walls of diatoms in the water body and bottom sediments of Lake Baikal. In: Likhoshway YeV, Crawford RM, editors. *Proceedings of 19th International Diatom Symposium*. Irkutsk: V.B. Sochava Institute of Geography SB RAS. 96.
66. Glöckner FO, Fuchs BM, Amann R (1999) Bacterioplankton compositions of lakes and oceans: A first comparison based on fluorescence in situ hybridization. *Appl Environ Microbiol* 65: 3721–3726.
67. Glöckner FO, Zaichikov E, Belkova N, Denissova L, Pernthaler J (2000) Comparative 16S rRNA analysis of lake bacterioplankton reveals globally distributed phylogenetic clusters including an abundant group of *Actinobacteria*. *Appl Environ Microbiol* 66: 5053–5065.
68. Garrity GM, Brenner DJ, Krieg NR, Staley JR (2004) *Bergey’s Manual of Systematic Bacteriology*. Volume 2: The Proteobacteria. Part B: The Gammaproteobacteria. Part C: The Alpha-, Beta-, Delta-, and Epsilonproteobacteria. New York: Springer Verlag. 2459 p.
69. Holt JG, Krieg NR, Sneath PHA, Staley JT, Williams T, editors (1994) *Bergey’s Manual of Determinative Bacteriology*, 9th ed. Baltimore: Williams & Wilkins.
70. Bezrukova EN, Bogdanov YA, Williams DF, Grachev MA, Ignatova NV, et al. (1991) Dramatic changes in the ecosystem of Lake Baikal in the Holocene. *Dokl Akad Nauk SSSR* 321: 1032–1037. [In Russian].
71. Karabanov EB, Prokopenko AA, Williams DF, Khursevich GK (2000) A new record of Holocene climate change from the bottom sediments of Lake Baikal. *Palaeogeogr Palaeoclimatol Palaeoecol* 156: 211–224.
72. Shimaraev MN, Granin NG, Kuimova LN (1995) Practice of reconstruction of Baikal hydrophysical conditions in the Late Pleistocene and Holocene. *Geol Geofiz* 36: 97–102. [In Russian].
73. Mackay AW (2007) The paleoclimatology of Lake Baikal: A diatom synthesis and prospectus. *Earth Sci Rev* 81: 81–215.
74. Weiss RF, Carmack EC, Koropalov VM (1991) Deep-water renewal and biological production in Lake Baikal. *Nature* 349: 665–669.
75. Schmid M, Budnev NM, Granin NG, Sturm M, Schurter M, et al. (2008) Lake Baikal deepwater renewal mystery solved. *Geophys Res Lett* 35: L09605, doi:10.1029/2008GL033223.
